# Supplementary material for: Safety and efficacy of combination of suberoylamilide hydroxyamic acid and mitomycin C in reducing pro-fibrotic changes in human corneal epithelial cells
Source: PubMed Central journal article supplement (PMC7902619; doi:10.1038/s41598-021-83881-y), 2021-02-23
Supplement: 41598_2021_83881_MOESM1_ESM.pdf [file 41598_2021_83881_MOESM1_ESM.pdf]

## **Safety and efficacy of combination of Suberoylamilide Hydroxyamic Acid and Mitomycin C in reducing pro-fibrotic changes in human corneal epithelial cells**

Rohit Shetty<sup>1</sup>, Nimisha R Kumar<sup>2</sup>, Murali Subramani<sup>3</sup>, Lekshmi Krishna<sup>3</sup>, Ponnalagu Murugeswari<sup>3</sup>, Himanshu Matalia<sup>1</sup>, Pooja Khamar<sup>1</sup>, Zelda V Dadachanji<sup>1</sup>, Rajiv R Mohan<sup>4,5,6</sup>, Arkasubhra Ghosh<sup>2\*</sup>, Debashish Das<sup>3\*</sup>

<sup>1</sup>Department of Cornea and Refractive Surgery, Narayana Nethralaya Eye Hospital, Bangalore, Karnataka, India

<sup>2</sup>GROW Laboratory, Narayana Nethralaya Foundation, Narayana Nethralaya, Bangalore, Karnataka, India.

<sup>3</sup>Stem Cell Research Lab, GROW Laboratory, Narayana Nethralaya Foundation, Narayana Nethralaya, Bangalore, Karnataka, India.

<sup>4</sup>Department of Veterinary Medicine and Surgery, University of Missouri, Columbia, MO, 65211, USA.

<sup>5</sup>Mason Eye Institute, School of Medicine, University of Missouri, Columbia, MO, 65212, USA.

<sup>6</sup>Harry S Truman Veterans' Memorial Hospital, Columbia, MO, 65201, USA.

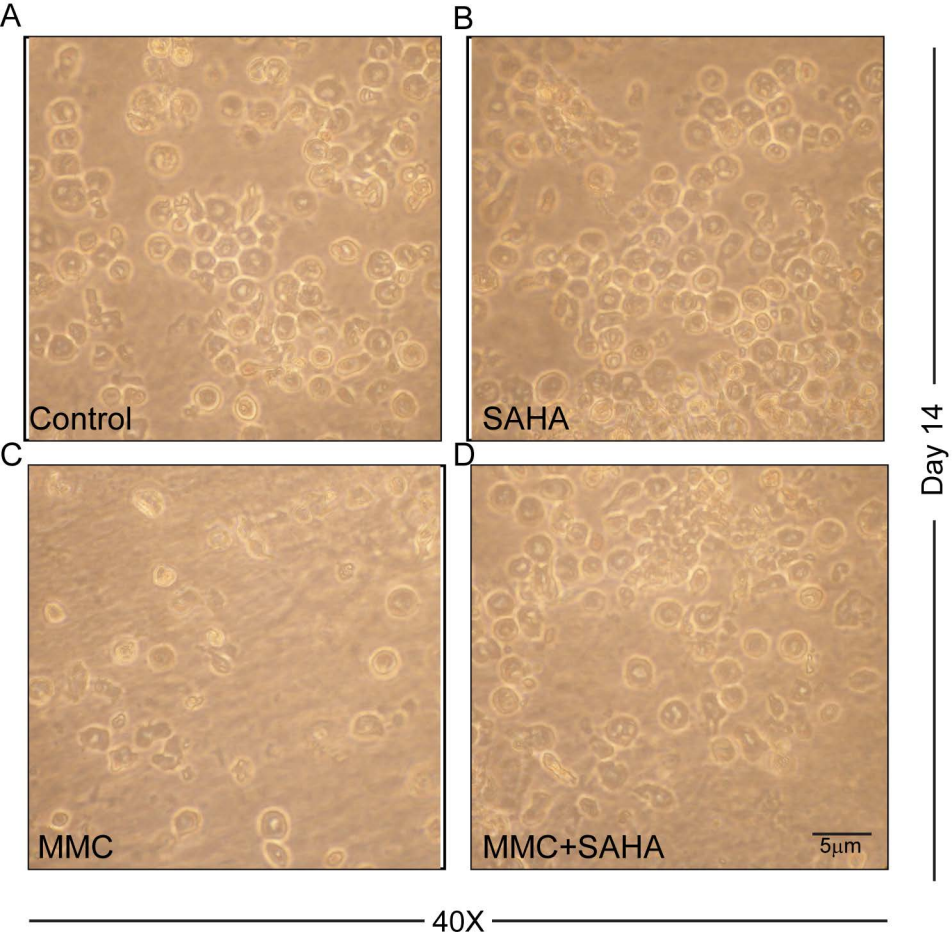

Supplementary Figure 1

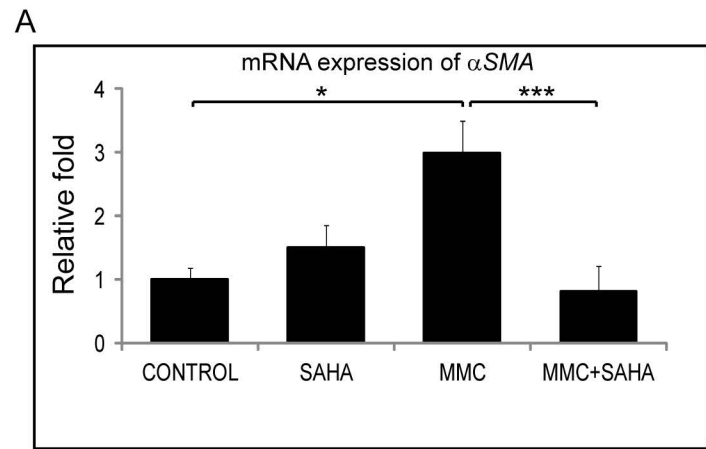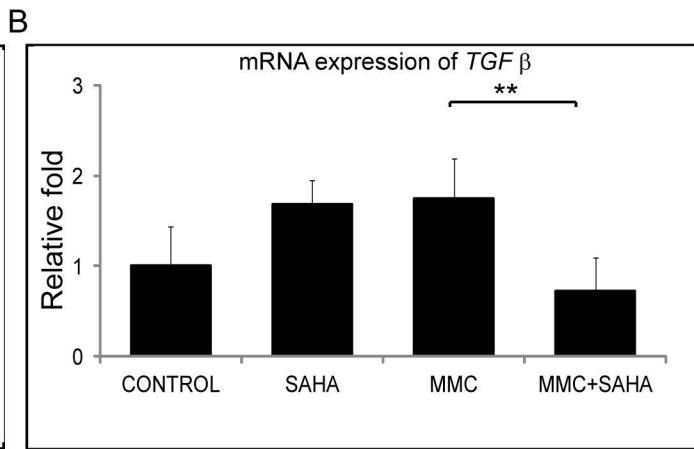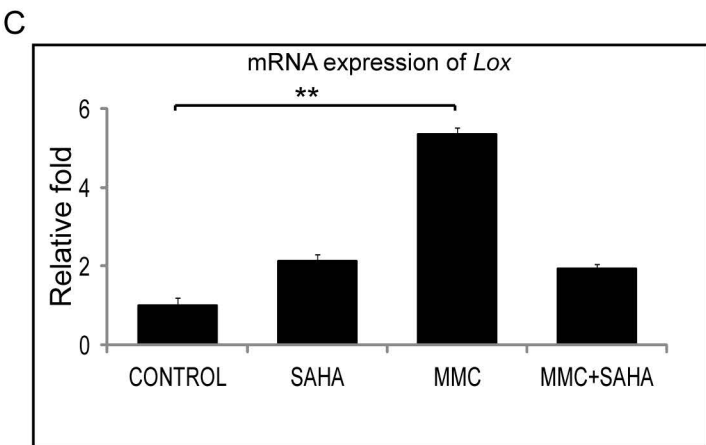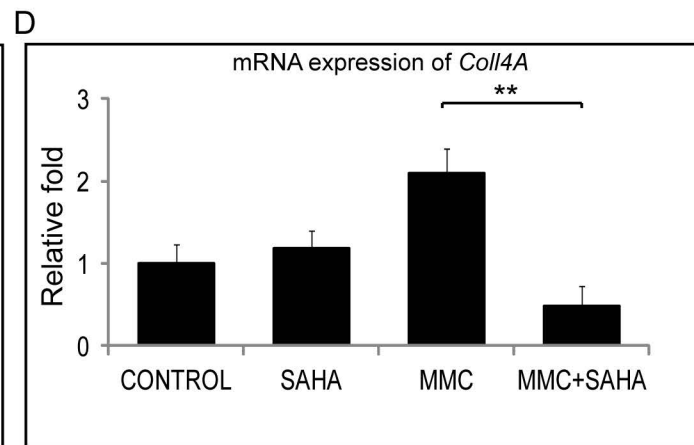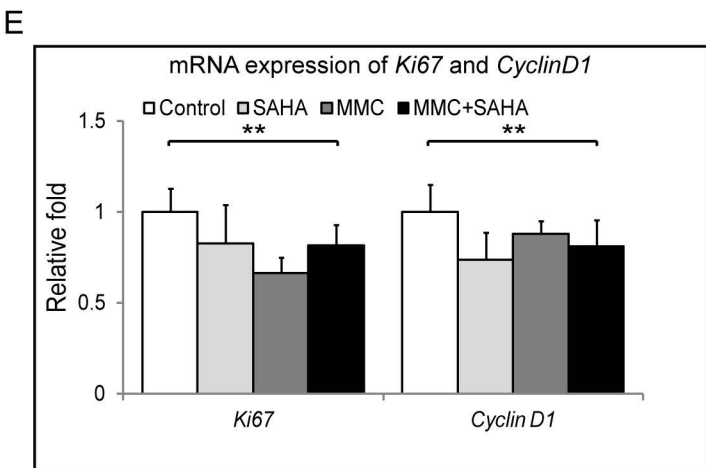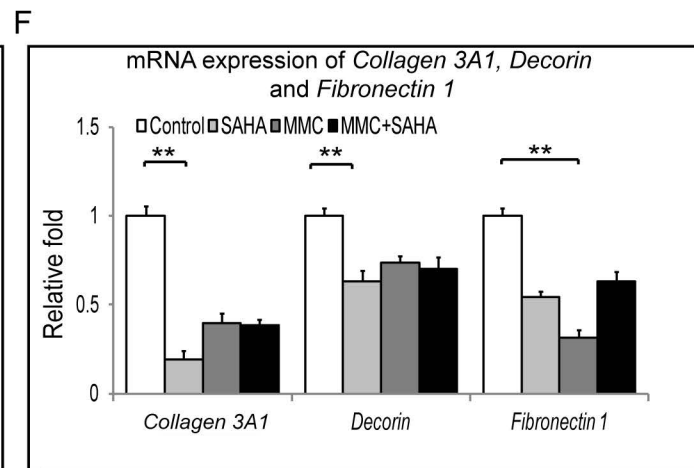

|      |   |   |   |   |   |   |   |   |   |   |   |   |   |   |   |   |   |   |   |   |   |   |   |   |
|------|---|---|---|---|---|---|---|---|---|---|---|---|---|---|---|---|---|---|---|---|---|---|---|---|
| MMC  | - | - | + | + | - | - | + | + | - | - | + | + | - | - | + | + | - | - | + | + | - | - | + | + |
| SAHA | - | + | - | + | - | + | - | + | - | + | - | + | - | + | - | + | - | + | - | + | - | + | - | + |

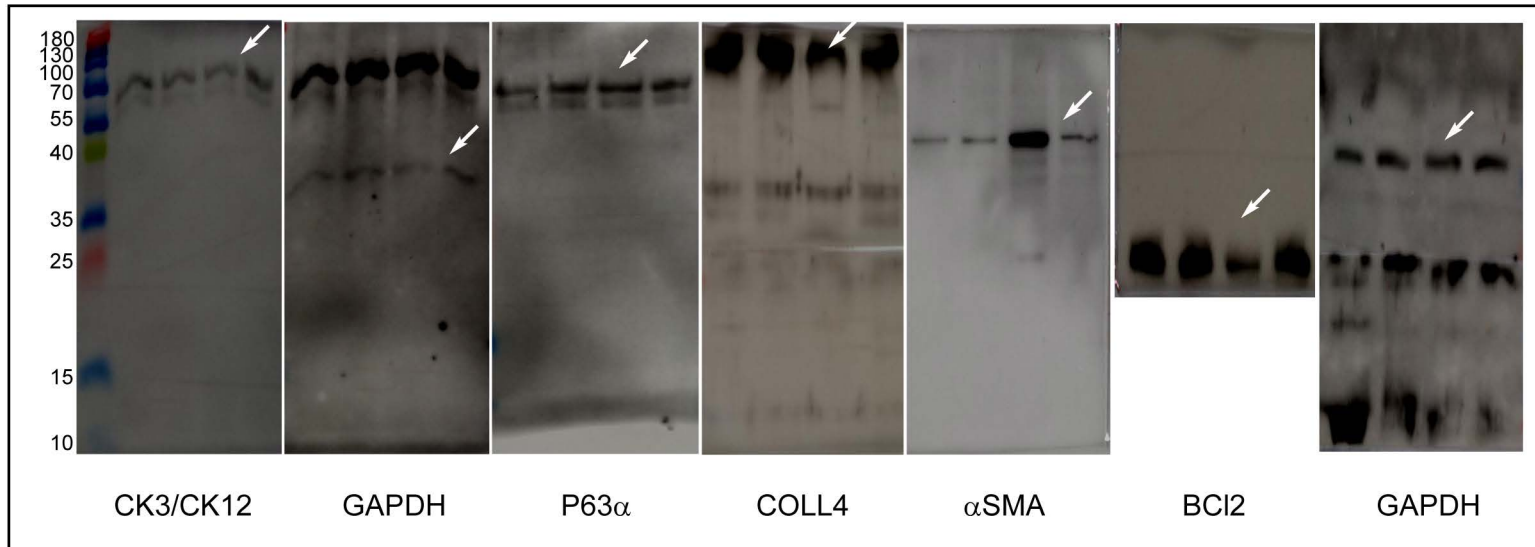

Supplementary figure 3
